# Supplementary material for: Molecular Basis of Selective Cytokine Signaling Inhibition by Antibodies Targeting a Shared Receptor
Source: PubMed Central journal article supplement (PMC8740070; doi:10.3389/fimmu.2021.779100), 2021-12-24

**Supplemental Figure 1: Deglycosylation of IL-1RAcP by Endoglycosidase A and IL-1/IL-33 Cell Signaling Inhibition** (A) Lane 1: Bio-Rad unstained protein ladder. Lane 2: Endoglycosidase A (EndoA). Lane 3: Glycosylated IL-1RAcP. Lane 4: Deglycosylated IL-1RAcP. (B) Table containing the  $IC_{50}$  and R-square values for IL-1 and IL-33 cell signaling assays.

**Supplemental Figure 2: Deuterium uptake of IL-1RAcP in apo form and antibody bound form by HDX-MS.** (A) Deuterium uptake graphs of CAN03 bound (red), CAN04 bound (blue), and Apo IL-1RAcP (black). This stretch of residues was used in figure 3A for our HDX-MS analysis of CAN03 binding to IL-1RAcP. (B) Deuterium uptake graphs of CAN03 bound (red), CAN04 bound (blue), and Apo IL-1RAcP (black). This stretch of residues was used in figure 3B for our HDX-MS analysis of CAN04 binding to IL-1RAcP. (C) IL-1RAcP HDX-MS peptide coverage on IL-1RAcP, wherein coverage is colored green and lack of coverage is colored dark grey. (D) Peptide coverage map of IL-1RAcP, wherein coverage was 65.2% and redundancy was 2.96.

**Supplemental Table 2: PISA analysis of IL-1 and IL-33 Signaling Complexes** (A) Table of PISA interface of chain C (IL-1RAcP) to chain A (IL-1 $\beta$ ) from the crystal structure of the IL-1 $\beta$  signaling complex (pdb: 4DEP). (B) Table of PISA interface of chain C (IL-1RAcP) to chain B (IL-1RI) from the crystal structure of the IL-1 $\beta$  signaling complex (pdb: 4DEP). (C) Table of PISA interface of chain C (IL-1RAcP) to chain A (IL-33) from the crystal structure of the IL-33 signaling complex (pdb: 5VI4). (D) Table of PISA interface of chain C (IL-1RAcP) to chain B (ST2) from the crystal structure of the IL-33 signaling complex (pdb: 5VI4).

**Supplemental Figure 3: Sensorgrams from corresponding SPR experiments for Extensive Alanine Scan** (A) Sensorgrams of IL-1RAcP alanine scan (Fc-fused IL-1RAcP with alanine mutations) and CAN03 as the analyte with  $\chi^2$  values of fit. (B) Sensorgrams of IL-1RAcP alanine scan (Fc-fused IL-1RAcP with alanine mutations) and CAN04 as the analyte with  $\chi^2$  values of fit.

**Supplemental Table 3: Kinetic data from Extensive Alanine Scan** (A)  $k_a$ ,  $k_d$ , and  $K_D$  values of alanine scan SPR experiment, with CAN03 as the analyte. (B)  $k_a$ ,  $k_d$ , and  $K_D$  values of alanine scan SPR experiment, with CAN04 as the analyte.

**Supplemental Figure 4: CAN03 and CAN04 combination IL-1 $\beta$  Cell Signaling Inhibition Assay** (A) A cell signaling assay containing CAN03 (red), CAN04 (blue), and a mix of CAN03/CAN04 (purple) to accompany Figure 7.

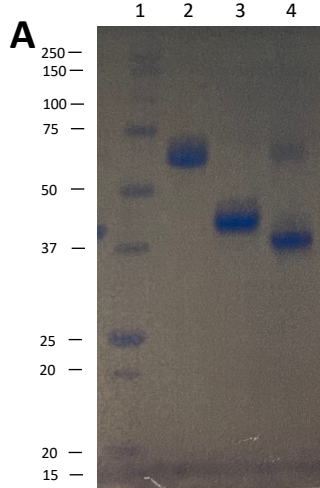

**B**

| Antagonist                                 | IC <sub>50</sub> of antagonists for IL-1 Signaling Inhibition | R-Square of IL-1 Non-linear fit | IC <sub>50</sub> of antagonists for IL-33 Signaling Inhibition | R-Square of IL-33 Non-linear fit |
|--------------------------------------------|---------------------------------------------------------------|---------------------------------|----------------------------------------------------------------|----------------------------------|
| Interleukin-1 Receptor Antagonist (IL-1Ra) | $1.64 * 10^{-10}$                                             | 0.98                            | -                                                              | -                                |
| Soluble ST2                                | -                                                             | -                               | $1.16 * 10^{-10}$                                              | 0.97                             |
| CAN03                                      | $4.37 * 10^{-9}$                                              | 0.88                            | $2.20 * 10^{-8}$                                               | 0.90                             |
| CAN04                                      | $4.87 * 10^{-11}$                                             | 0.98                            | $7.82 * 10^{-10}$                                              | 0.90                             |

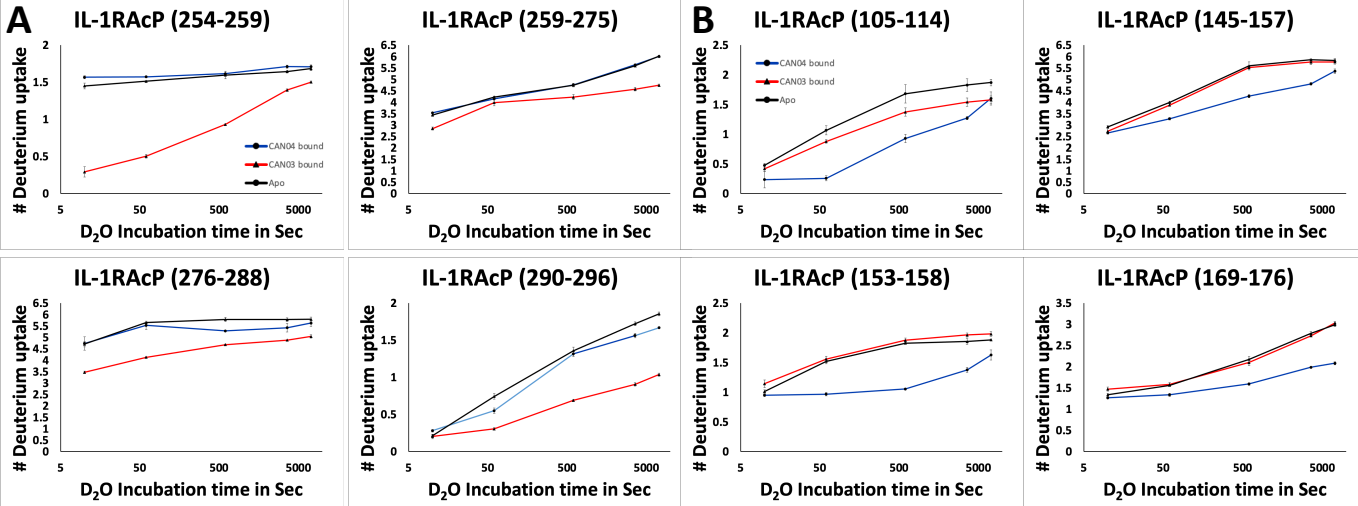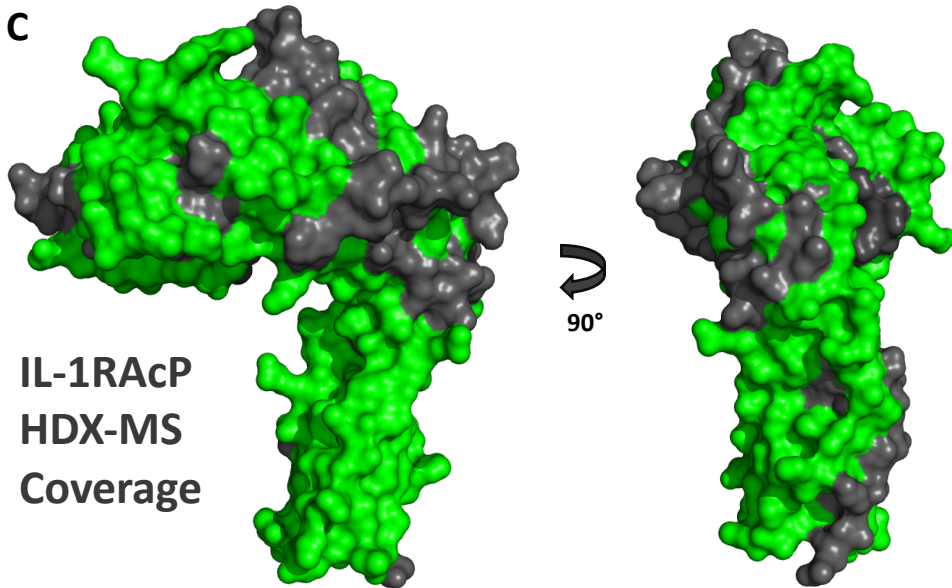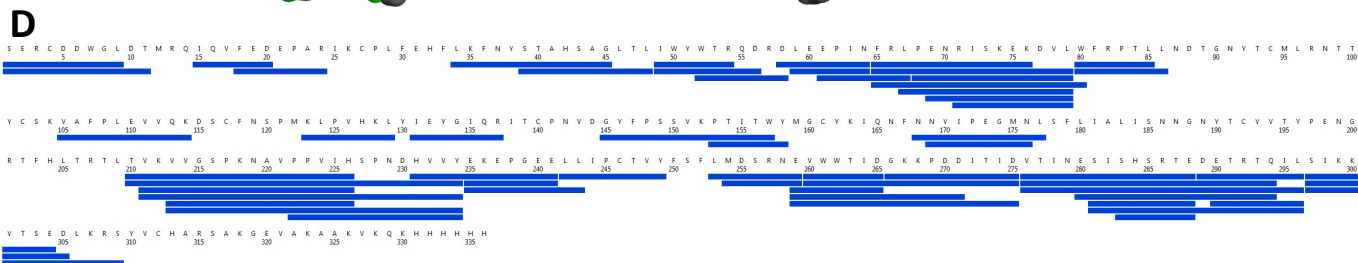

# A PISA Analysis: IL-1 $\beta$ interface on IL-1RAcP

| Region   | ##  | Structure 1 | HSDC | ASA   | BSA    | $\Delta iG$ |
|----------|-----|-------------|------|-------|--------|-------------|
| Domain 2 | 129 | C: ILE 131  |      | 35.1  | 29.76  | 0.48        |
| Domain 2 | 130 | C: GLU 132  | S    | 105.5 | 51.52  | -0.25       |
| Domain 2 | 157 | C: MET 159  |      | 51.9  | 23.85  | 0.85        |
| Domain 2 | 160 | C: TYR 162  |      | 163.9 | 15.49  | 0.25        |
| Domain 2 | 163 | C: GLN 165  | H    | 66.6  | 14.10  | -0.07       |
| Domain 2 | 164 | C: ASN 166  | H    | 155.7 | 52.41  | -0.29       |
| Domain 2 | 165 | C: PHE 167  |      | 65.6  | 43.42  | 0.56        |
| Domain 2 | 166 | C: ASN 168  | H    | 140.2 | 113.28 | 0.02        |
| Domain 2 | 167 | C: ASN 169  |      | 18.8  | 0.61   | -0.01       |
| Domain 2 | 168 | C: VAL 170  |      | 3.99  | 2.68   | 0.04        |
| Domain 2 | 179 | C: ILE 181  |      | 90.6  | 1.49   | 0.02        |
| Domain 2 | 181 | C: LEU 183  |      | 79.0  | 64.84  | 1.04        |
| Domain 2 | 182 | C: ILE 184  |      | 75.5  | 59.26  | 0.82        |
| Domain 2 | 183 | C: SER 185  |      | 83.1  | 79.12  | 0.71        |
| Domain 2 | 184 | C: ASN 186  |      | 8.18  | 8.18   | -0.09       |
| Domain 2 | 188 | C: TYR 190  |      | 1.40  | 0.49   | -0.01       |
| Linker   | 217 | C: ASN 219  |      | 105.8 | 14.86  | -0.17       |
| Domain 3 | 260 | C: ARG 286  | HS   | 183.7 | 106.51 | -0.98       |
| Domain 3 | 261 | C: THR 287  |      | 29.4  | 16.16  | 0.23        |

|                               |                                                                          |
|-------------------------------|--------------------------------------------------------------------------|
| <b>Region</b>                 | Domain Location of Interaction                                           |
| <b>##</b>                     | Line Number                                                              |
| <b>Structure 1</b>            | Chain – Amino Acid - # in PDB file                                       |
| <b>HSDC</b>                   | Residues making Hydrogen/Disulphide bond, Salt Bridge, or Covalent Link. |
| <b>ASA</b>                    | Accessible Surface Area, Å <sup>2</sup>                                  |
| <b>BSA</b>                    | Buried Surface Area, Å <sup>2</sup>                                      |
| <b><math>\Delta iG</math></b> | Solvation energy effect, kcal/mol                                        |
|                               | Buried area percentage, one bar per 10%                                  |

# B PISA Analysis: IL-1RI interface on IL-1RAcP

| Region   | ##  | Structure 1 | HSDC | ASA   | BSA   | $\Delta iG$ |
|----------|-----|-------------|------|-------|-------|-------------|
| Domain 2 | 130 | C:GLU 132   |      | 105.5 | 47.49 | -0.49       |
| Domain 2 | 131 | C:TYR 133   |      | 76.9  | 3.29  | 0.05        |
| Domain 2 | 132 | C:GLY 134   | H    | 37.9  | 36.15 | 0.38        |
| Domain 2 | 133 | C:ILE 135   |      | 106.6 | 74.39 | 1.14        |
| Domain 2 | 135 | C:ARG 137   |      | 125.1 | 4.96  | -0.18       |
| Domain 2 | 164 | C:ASN 166   |      | 155.7 | 2.82  | -0.05       |
| Domain 2 | 165 | C:PHE 167   |      | 65.6  | 4.54  | -0.05       |
| Domain 2 | 166 | C:ASN 168   | H    | 140.2 | 26.96 | -0.22       |
| Domain 2 | 167 | C:ASN 169   |      | 18.8  | 1.34  | 0.02        |
| Domain 2 | 169 | C:ILE 171   |      | 76.2  | 44.32 | 0.71        |
| Domain 2 | 171 | C:GLU 173   |      | 74.9  | 9.46  | -0.16       |
| Domain 2 | 178 | C:LEU 180   |      | 63.7  | 57.32 | 0.92        |
| Domain 2 | 179 | C:ILE 181   |      | 90.6  | 63.33 | 1.01        |
| Domain 2 | 182 | C:ILE 184   |      | 75.5  | 1.32  | 0.02        |
| Linker   | 216 | C:LYS 218   | S    | 152.4 | 66.13 | -0.97       |
| Linker   | 217 | C:ASN 219   |      | 105.8 | 55.59 | -0.25       |
| Domain 3 | 224 | C:HIS 226   | S    | 169.8 | 82.39 | 0.39        |
| Domain 3 | 227 | C:PRO 245   |      | 79.3  | 7.85  | 0.13        |
| Domain 3 | 229 | C:THR 247   |      | 30.0  | 5.52  | 0.09        |
| Domain 3 | 231 | C:TYR 249   |      | 45.4  | 22.25 | 0.36        |
| Domain 3 | 259 | C:SER 285   |      | 55.1  | 24.16 | 0.39        |
| Domain 3 | 260 | C:ARG 286   |      | 183.7 | 30.90 | 0.28        |
| Domain 3 | 261 | C:THR 287   |      | 29.4  | 13.30 | 0.03        |
| Domain 3 | 263 | C:ASP 289   |      | 47.8  | 17.60 | -0.21       |
| Domain 3 | 265 | C:THR 291   | H    | 47.0  | 27.27 | 0.11        |

|                               |                                                                          |
|-------------------------------|--------------------------------------------------------------------------|
| <b>Region</b>                 | Domain Location of Interaction                                           |
| <b>##</b>                     | Line Number                                                              |
| <b>Structure 1</b>            | Chain – Amino Acid - # in PDB file                                       |
| <b>HSDC</b>                   | Residues making Hydrogen/Disulphide bond, Salt Bridge, or Covalent Link. |
| <b>ASA</b>                    | Accessible Surface Area, Å <sup>2</sup>                                  |
| <b>BSA</b>                    | Buried Surface Area, Å <sup>2</sup>                                      |
| <b><math>\Delta iG</math></b> | Solvation energy effect, kcal/mol                                        |
|                               | Buried area percentage, one bar per 10%                                  |

# C PISA Analysis: IL-33 interface on IL-1RAcP

| Region   | ##  | Structure 1 | HSDC | ASA   | BSA    | $\Delta iG$ |
|----------|-----|-------------|------|-------|--------|-------------|
| Domain 2 | 129 | C:ILE 151   |      | 29.3  | 1.50   | 0.02        |
| Domain 2 | 130 | C:GLU 152   | H    | 114.1 | 48.79  | -0.45       |
| Domain 2 | 157 | C:LYS 179   | HS   | 58.3  | 23.75  | -0.18       |
| Domain 2 | 164 | C:ASP 186   |      | 83.2  | 20.12  | -0.23       |
| Domain 2 | 165 | C:PHE 187   |      | 72.3  | 48.31  | 0.77        |
| Domain 2 | 166 | C:HIS 188   | H    | 177.5 | 112.50 | -0.06       |
| Domain 2 | 167 | C:ASN 189   |      | 16.8  | 8.25   | 0.10        |
| Domain 2 | 181 | C:LEU 203   |      | 58.8  | 51.06  | 0.82        |
| Domain 2 | 182 | C:VAL 204   |      | 63.3  | 5.84   | 0.09        |
| Domain 2 | 183 | C:SER 205   | H    | 87.0  | 60.08  | 0.09        |
| Domain 2 | 184 | C:ASN 206   |      | 6.30  | 1.52   | -0.02       |
| Domain 3 | 239 | C:LYS 267   |      | 91.3  | 13.16  | -0.49       |
| Domain 3 | 264 | C:VAL 302   |      | 68.7  | 6.99   | -0.08       |
| Domain 3 | 265 | C:SER 303   | H    | 65.8  | 49.12  | 0.24        |
| Domain 3 | 266 | C:TYR 304   |      | 132.7 | 17.50  | -0.20       |
| Domain 3 | 267 | C:SER 305   |      | 45.1  | 5.74   | 0.09        |
| Domain 3 | 268 | C:SER 306   |      | 71.9  | 23.60  | 0.20        |

|                               |                                                                          |
|-------------------------------|--------------------------------------------------------------------------|
| <b>Region</b>                 | Domain Location of Interaction                                           |
| <b>##</b>                     | Line Number                                                              |
| <b>Structure 1</b>            | Chain – Amino Acid - # in PDB file                                       |
| <b>HSDC</b>                   | Residues making Hydrogen/Disulphide bond, Salt Bridge, or Covalent Link. |
| <b>ASA</b>                    | Accessible Surface Area, Å <sup>2</sup>                                  |
| <b>BSA</b>                    | Buried Surface Area, Å <sup>2</sup>                                      |
| <b><math>\Delta iG</math></b> | Solvation energy effect, kcal/mol                                        |
|                               | Buried area percentage, one bar per 10%                                  |

# D PISA Analysis: ST2 interface on IL-1RAcP

| Region   | ##  | Structure 1 | HSDC | ASA   | BSA    | $\Delta iG$ |
|----------|-----|-------------|------|-------|--------|-------------|
| Domain 2 | 129 | C:ILE 151   |      | 29.3  | 5.90   | 0.03        |
| Domain 2 | 130 | C:GLU 152   |      | 114.1 | 65.32  | -0.26       |
| Domain 2 | 131 | C:HIS 153   |      | 84.3  | 1.68   | 0.03        |
| Domain 2 | 132 | C:GLY 154   |      | 53.3  | 38.38  | 0.36        |
| Domain 2 | 133 | C:ILE 155   | H    | 116.5 | 90.85  | 1.16        |
| Domain 2 | 135 | C:LYS 157   |      | 101.9 | 17.42  | 0.06        |
| Domain 2 | 164 | C:ASP 186   | HS   | 83.2  | 42.91  | -0.57       |
| Domain 2 | 165 | C:PHE 187   | H    | 72.3  | 11.40  | -0.01       |
| Domain 2 | 166 | C:HIS 188   | H    | 177.5 | 65.01  | 0.29        |
| Domain 2 | 167 | C:ASN 189   |      | 16.8  | 4.00   | 0.06        |
| Domain 2 | 168 | C:VAL 190   |      | 0.12  | 0.12   | -0.00       |
| Domain 2 | 169 | C:LEU 191   |      | 62.8  | 21.25  | 0.34        |
| Domain 2 | 171 | C:GLU 193   | HS   | 80.3  | 11.72  | -0.16       |
| Domain 2 | 176 | C:SER 198   | H    | 1.54  | 1.54   | 0.01        |
| Domain 2 | 178 | C:PHE 200   |      | 76.9  | 76.36  | 1.15        |
| Domain 2 | 179 | C:ILE 201   |      | 101.3 | 87.43  | 1.40        |
| Linker   | 214 | C:SER 236   |      | 6.47  | 3.44   | -0.04       |
| Linker   | 216 | C:LYS 238   | HS   | 171.7 | 63.95  | -1.06       |
| Linker   | 217 | C:ASP 239   | HS   | 92.5  | 71.14  | -0.15       |
| Domain 3 | 219 | C:LEU 241   |      | 87.1  | 69.44  | 1.11        |
| Domain 3 | 220 | C:PRO 242   |      | 52.1  | 12.23  | 0.20        |
| Domain 3 | 221 | C:PRO 243   |      | 5.26  | 1.35   | -0.02       |
| Domain 3 | 222 | C:GLN 244   | H    | 68.8  | 67.95  | -0.52       |
| Domain 3 | 223 | C:ILE 245   | H    | 35.5  | 35.56  | -0.21       |
| Domain 3 | 224 | C:TYR 246   |      | 116.7 | 113.59 | 0.91        |
| Domain 3 | 225 | C:SER 247   |      | 26.8  | 9.37   | 0.15        |
| Domain 3 | 226 | C:PRO 248   |      | 1.72  | 1.22   | -0.01       |
| Domain 3 | 227 | C:ASN 249   | H    | 62.1  | 52.72  | -0.11       |
| Domain 3 | 228 | C:ASP 250   |      | 83.6  | 16.04  | -0.11       |
| Domain 3 | 229 | C:ARG 251   |      | 227.9 | 119.57 | -0.89       |
| Domain 3 | 230 | C:VAL 252   |      | 53.0  | 30.94  | 0.50        |
| Domain 3 | 239 | C:LYS 267   |      | 91.3  | 15.66  | -0.42       |
| Domain 3 | 241 | C:TYR 269   |      | 53.4  | 40.91  | 0.24        |
| Domain 3 | 243 | C:SER 271   |      | 5.37  | 1.10   | -0.01       |
| Domain 3 | 298 | C:ALA 341   |      | 23.8  | 9.37   | 0.15        |
| Domain 3 | 299 | C:GLU 342   |      | 121.9 | 10.68  | -0.12       |
| Domain 3 | 300 | C:GLN 343   | H    | 56.9  | 30.03  | -0.27       |

|                               |                                                                          |
|-------------------------------|--------------------------------------------------------------------------|
| <b>Region</b>                 | Domain Location of Interaction                                           |
| <b>##</b>                     | Line Number                                                              |
| <b>Structure 1</b>            | Chain – Amino Acid - # in PDB file                                       |
| <b>HSDC</b>                   | Residues making Hydrogen/Disulphide bond, Salt Bridge, or Covalent Link. |
| <b>ASA</b>                    | Accessible Surface Area, Å <sup>2</sup>                                  |
| <b>BSA</b>                    | Buried Surface Area, Å <sup>2</sup>                                      |
| <b><math>\Delta iG</math></b> | Solvation energy effect, kcal/mol                                        |
|                               | Buried area percentage, one bar per 10%                                  |

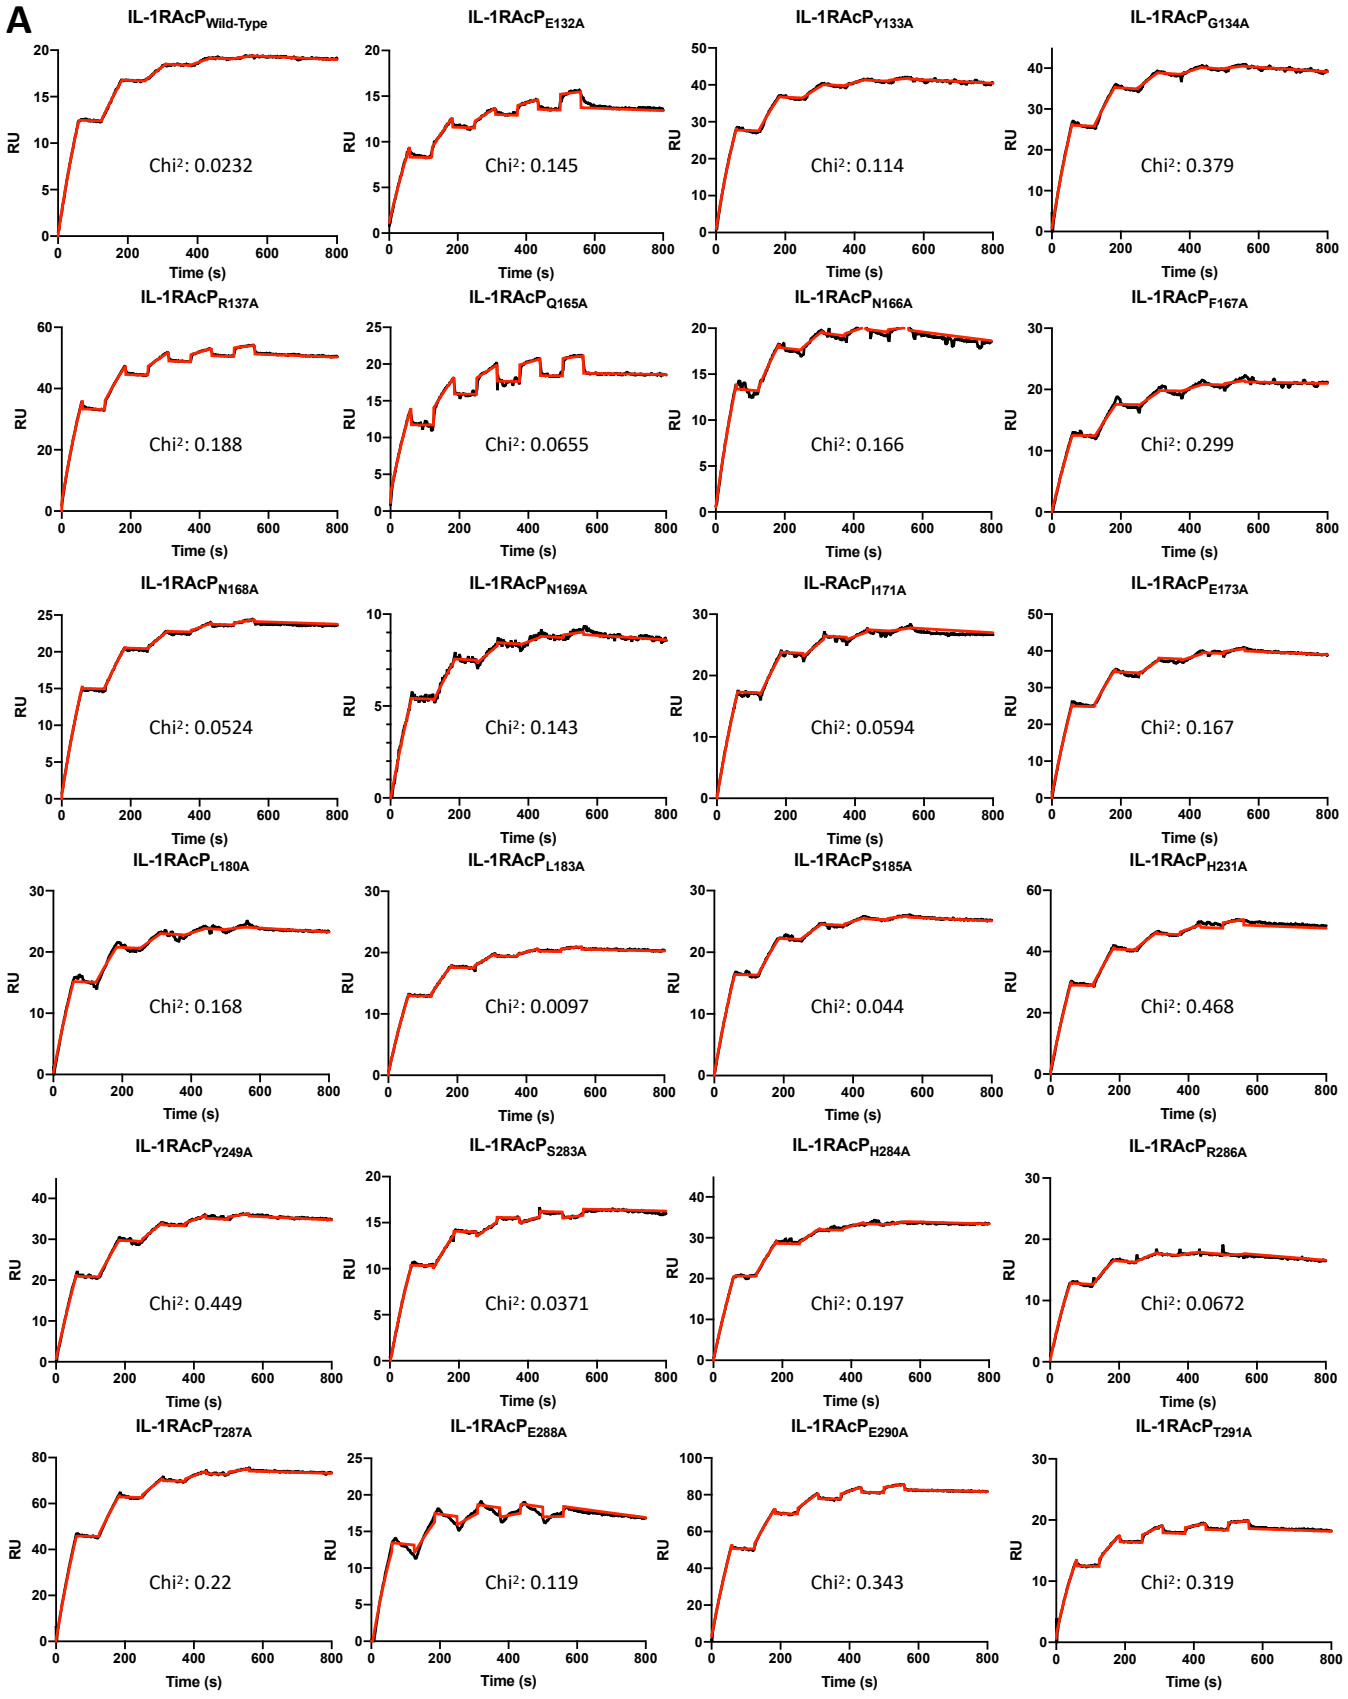



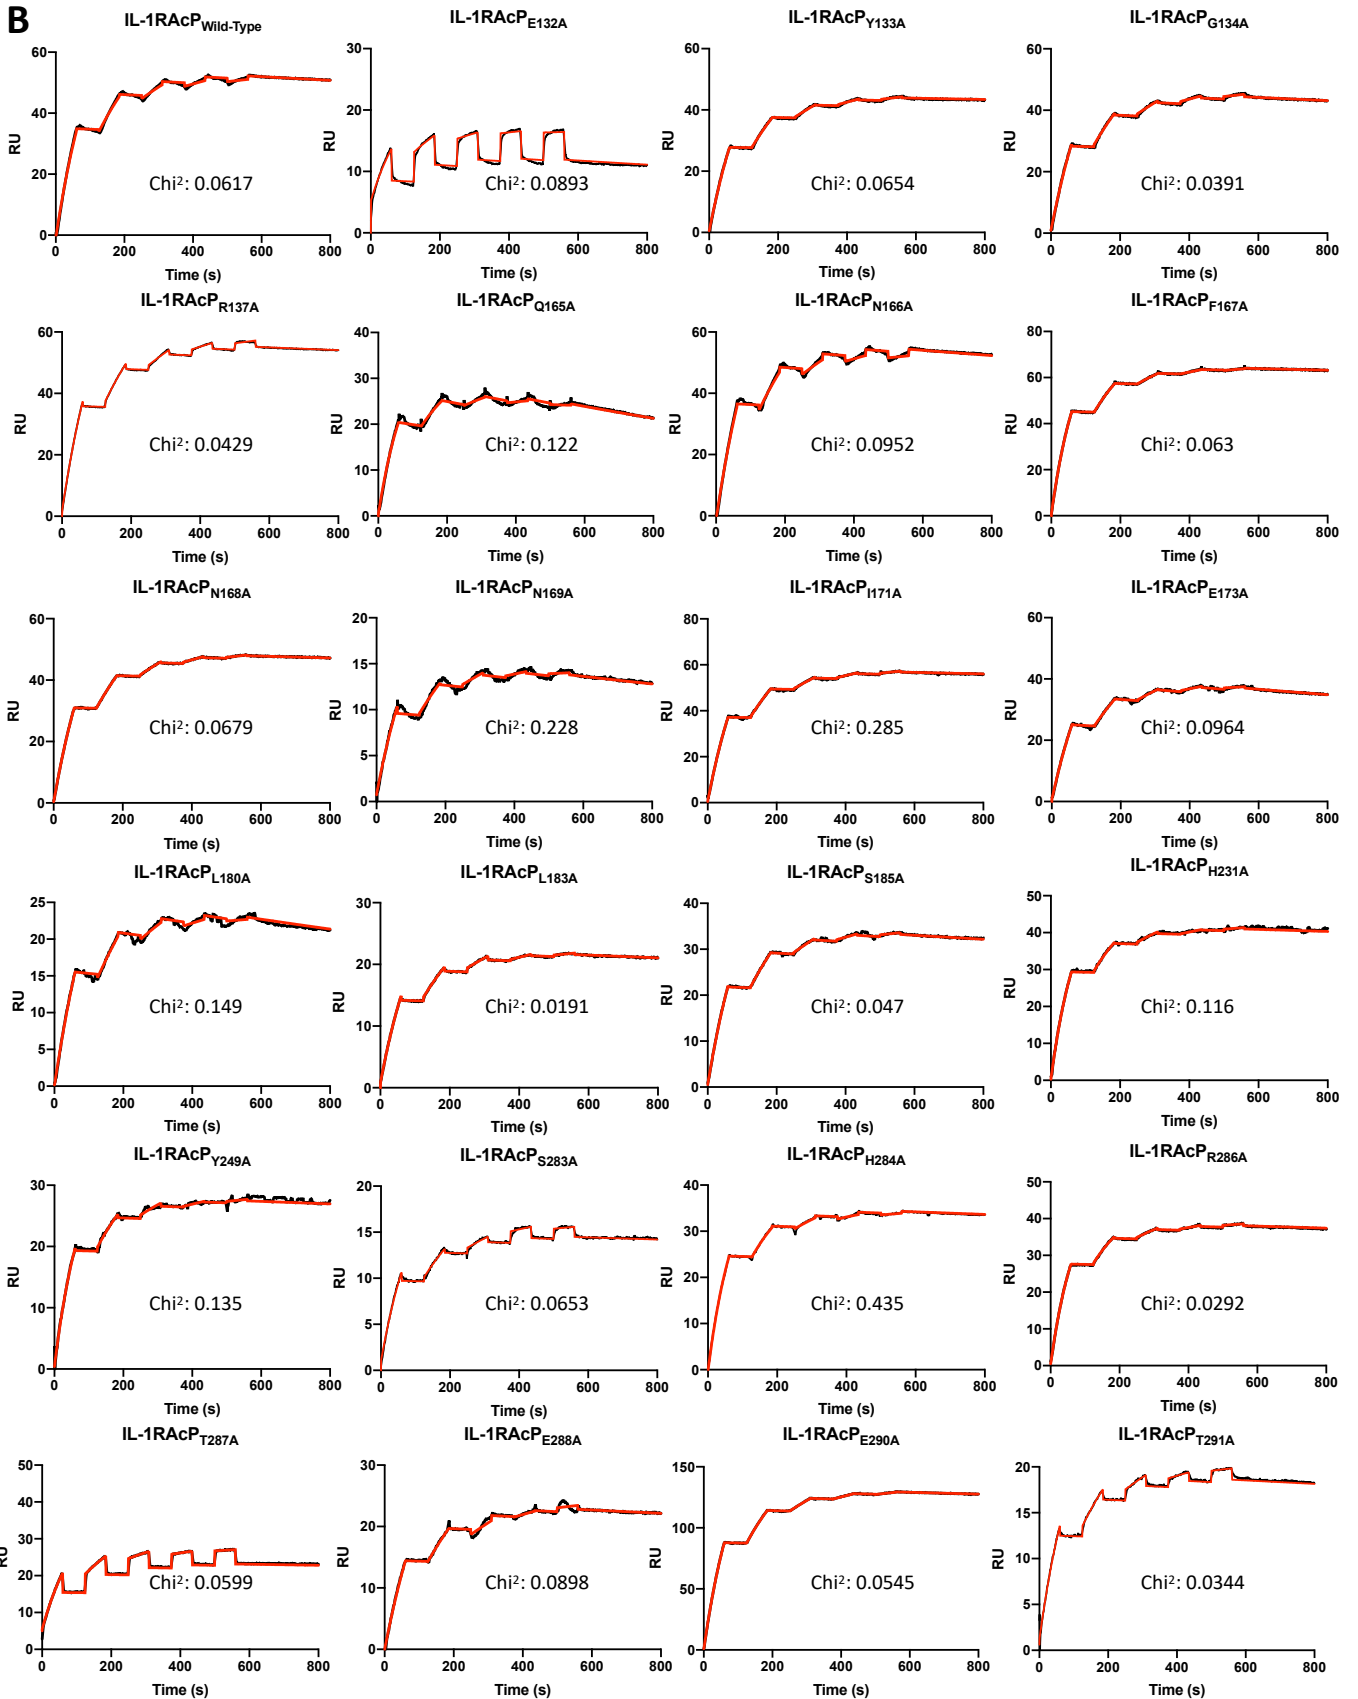

**A** Analyte: CAN03 Fab

| Ligand    | $k_a$ ( $10^5 \text{ M}^{-1} \text{ S}^{-1}$ ) | $k_d$ ( $10^{-5} \text{ S}^{-1}$ ) | $K_D$ (100pM) |
|-----------|------------------------------------------------|------------------------------------|---------------|
| Wild-type | 3.2 ± 0.6                                      | 10.1 ± 3.5                         | 3.1 ± 1.1     |
| E132A     | 2.0 ± 0.5                                      | 10.0 ± 0.5                         | 5.1 ± 0.9     |
| Y133A     | 3.5 ± 2.4                                      | 10.1 ± 2.5                         | 3.5 ± 1.7     |
| G134A     | 4.3 ± 0.2                                      | 13.5 ± 0.0                         | 3.1 ± 0.2     |
| R137A     | 4.3 ± 0.1                                      | 11.7 ± 4.3                         | 2.8 ± 1.1     |
| Q165A     | 2.7 ± 0.0                                      | 14.9 ± 1.3                         | 5.5 ± 0.5     |
| N166A     | 3.3 ± 0.5                                      | 9.5 ± 3.6                          | 2.8 ± 0.7     |
| F167A     | 2.2 ± 0.1                                      | 6.4 ± 1.8                          | 2.6 ± 0.7     |
| N168A     | 3.5 ± 0.2                                      | 7.6 ± 1.8                          | 2.1 ± 0.4     |
| N169A     | 2.6 ± 0.4                                      | 14.7 ± 0.3                         | 5.7 ± 1.1     |
| I171A     | 3.2 ± 0.3                                      | 10.4 ± 4.7                         | 3.2 ± 1.2     |
| E173A     | 3.3 ± 0.3                                      | 9.4 ± 2.7                          | 2.8 ± 0.6     |
| L180A     | 3.6 ± 0.1                                      | 15.7 ± 1.0                         | 4.3 ± 0.2     |
| L183A     | 3.3 ± 0.7                                      | 7.4 ± 1.7                          | 2.3 ± 1.0     |
| S185A     | 4.7 ± 0.5                                      | 11.5 ± 0.3                         | 2.4 ± 0.3     |
| H231A     | 3.8 ± 0.7                                      | 9.0 ± 2.4                          | 2.5 ± 1.1     |
| Y249A     | 2.5 ± 1.3                                      | 12.2 ± 1.8                         | 5.3 ± 2.0     |
| S283A     | 3.2 ± 0.5                                      | 5.5 ± 0.2                          | 1.7 ± 0.3     |
| H284A     | 3.2 ± 0.1                                      | 6.5 ± 1.5                          | 2.0 ± 0.5     |
| R286A     | 4.9 ± 1.4                                      | 23.0 ± 3.0                         | 4.7 ± 2.8     |
| T287A     | 3.1 ± 1.1                                      | 7.1 ± 1.5                          | 2.5 ± 1.4     |
| E288A     | 3.2 ± 0.0                                      | 2.4 ± 0.2                          | 0.8 ± 0.1     |
| E290A     | 3.8 ± 0.6                                      | 6.7 ± 1.8                          | 1.7 ± 0.2     |
| T291A     | 3.5 ± 0.4                                      | 8.6 ± 2.7                          | 2.5 ± 1.0     |

**B** Analyte: CAN04 Fab

| Ligand    | $k_a$ ( $10^5 \text{ M}^{-1} \text{ S}^{-1}$ ) | $k_d$ ( $10^{-5} \text{ S}^{-1}$ ) | $K_D$ (100pM) |
|-----------|------------------------------------------------|------------------------------------|---------------|
| Wild-type | 5.6 ± 2.0                                      | 9.8 ± 5.0                          | 1.8 ± 0.6     |
| E132A     | 5.3 ± 0.6                                      | 18.7 ± 6.2                         | 3.6 ± 1.6     |
| Y133A     | 4.0 ± 0.3                                      | 6.5 ± 2.3                          | 1.6 ± 0.5     |
| G134A     | 4.5 ± 0.7                                      | 12.1 ± 0.4                         | 2.7 ± 0.4     |
| R137A     | 5.4 ± 1.6                                      | 13.1 ± 6.8                         | 2.3 ± 0.5     |
| Q165A     | 3.0 ± 2.2                                      | 53.2 ± 21.5                        | 20.4 ± 7.6    |
| N166A     | 4.1 ± 0.4                                      | 15.3 ± 1.2                         | 3.7 ± 0.0     |
| F167A     | 7.3 ± 1.1                                      | 6.0 ± 0.5                          | 0.8 ± 0.1     |
| N168A     | 4.3 ± 0.2                                      | 6.3 ± 2.4                          | 1.5 ± 0.5     |
| N169A     | 4.1 ± 0.1                                      | 17.7 ± 0.6                         | 4.3 ± 0.0     |
| I171A     | 4.7 ± 0.2                                      | 4.3 ± 0.1                          | 0.9 ± 0.1     |
| E173A     | 3.8 ± 0.1                                      | 23.9 ± 2.3                         | 6.3 ± 0.4     |
| L180A     | 3.3 ± 0.4                                      | 24.0 ± 9.3                         | 7.4 ± 3.7     |
| L183A     | 4.5 ± 0.2                                      | 9.1 ± 2.2                          | 2.4 ± 0.6     |
| S185A     | 4.6 ± 0.1                                      | 12.3 ± 2.9                         | 2.7 ± 0.6     |
| H231A     | 5.7 ± 1.5                                      | 8.4 ± 2.3                          | 1.6 ± 0.8     |
| Y249A     | 5.2 ± 1.7                                      | 9.6 ± 2.8                          | 2.0 ± 1.2     |
| S283A     | 5.1 ± 0.3                                      | 9.1 ± 1.8                          | 2.0 ± 0.3     |
| H284A     | 5.5 ± 1.9                                      | 8.9 ± 1.0                          | 1.8 ± 0.8     |
| R286A     | 11.6 ± 1.5                                     | 7.7 ± 0.9                          | 1.3 ± 0.5     |
| T287A     | 5.2 ± 0.1                                      | 5.1 ± 1.8                          | 1.0 ± 0.4     |
| E288A     | 3.5 ± 0.4                                      | 10.8 ± 2.1                         | 3.1 ± 1.0     |
| E290A     | 6.7 ± 1.8                                      | 8.4 ± 3.6                          | 1.2 ± 0.2     |
| T291A     | 4.5 ± 0.3                                      | 10.0 ± 0.6                         | 2.2 ± 0.0     |

A

IL-1 $\beta$  Signaling Inhibition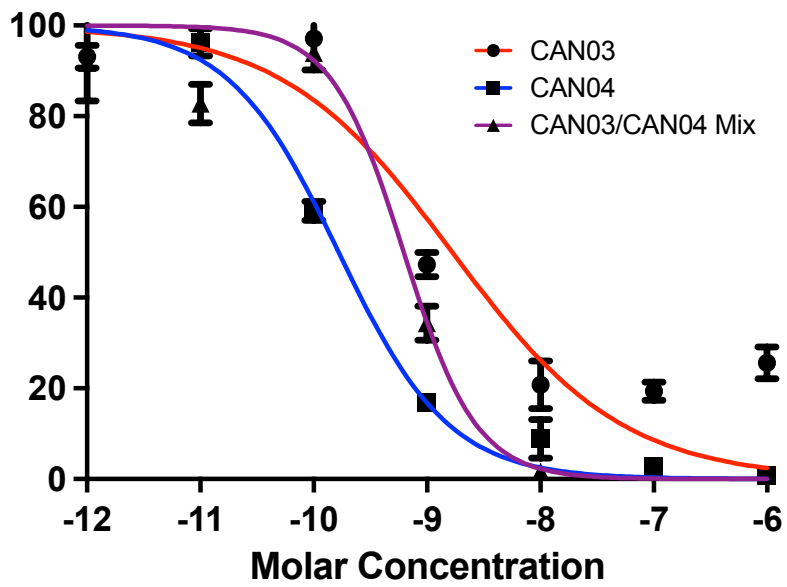

Supplement: DataSheet_1.pdf [file DataSheet_1.pdf]
